# Supplementary material for: The causal relationship between obesity and skin and soft tissue infections: A two-sample Mendelian randomization study
Source: Front Endocrinol (Lausanne). 2022 Dec 7;13:996863. doi: 10.3389/fendo.2022.996863 (PMC9768473; doi:10.3389/fendo.2022.996863)
Supplement: Supplementary Table 1 — Data source information. BMI, body mass index; T2D, type 2 diabetes; SSTI, skin and soft tissue infection. [file Table_1.xlsx]

## Sheet: Data souce information
Exposures	Cases	Control	Sample size	Population
BMI	NA	NA	461460	European
T2D	18228	444705	462933	European
Peripheral vascular disease	1456	461554	463010	European
SSTI	10343	208449	218792	European
Impetigo	606	208449	209055	European
Cutaneous abscess, furuncle and carbuncle	3809	208449	212258	European
Cellulitis	3085	208449	211534	European
Acute lymphadenitis	1004	208449	209453	European
Pilonidal cyst	1500	208449	209949	European
Other local infections of skin and subcutaneous tissue	1277	208449	209726	European
Hip circumference	NA	NA	462117	European
Waist circumference	NA	NA	462166	European
Waist-to-hip ratio	NA	NA	210082	European
Body fat percentage	NA	NA	454633	European
Whole body fat mass	NA	NA	454137	European
